# Supplementary material
Source: PubMed Central journal article supplement (PMC7799013)
Supplement: dkaa500_supplementary_data.pdf [file dkaa500_supplementary_data.pdf]

## Supplementary information:

### Pharmacokinetics of remdesivir in a COVID-19 patient with end-stage renal disease on intermittent hemodialysis

#### Supplementary table 1

General patient characteristics and medical history

|                                   |                                                                                                                                                                                     |
|-----------------------------------|-------------------------------------------------------------------------------------------------------------------------------------------------------------------------------------|
| <b>Age</b>                        | Mid seventies                                                                                                                                                                       |
| <b>Gender</b>                     | Male                                                                                                                                                                                |
| <b>Weight</b>                     | 53.2 kg                                                                                                                                                                             |
| <b>Glomerular Filtration Rate</b> | 0 mL/min (no residual renal function)                                                                                                                                               |
| <b>Relevant medical history</b>   | End-stage renal disease due to IgA-nephropathy<br>Intermittent hemodialysis for > 20 years<br>Paroxysmal atrial fibrillation<br>Type 2 diabetes mellitus<br>Coronary artery disease |

**Supplementary table 2**

## Concomitant medication during remdesivir treatment

| <b>Medication</b>                 | <b>Dose</b>  | <b>Indication</b>                         |
|-----------------------------------|--------------|-------------------------------------------|
| Piperacillin/tazobactam           | 2 x 4.5 g*   | Suspected bacterial superinfection        |
| Metoclopramide                    | 3 x 10 mg    | Nausea                                    |
| Dexamethasone                     | 1 x 6 mg     | Severe COVID-19                           |
| Famotidine                        | 1 x 20 mg    | Stress ulcer prophylaxis                  |
| Acetylsalicylic acid              | 1 x 100 mg   | Secondary prevention after NSTEMI         |
| Levothyroxine                     | 1 x 75 µg    | Hypothyroidism                            |
| Tilidin/naloxone                  | 2 x 100/8 mg | Chronic Pain Syndrome                     |
| Calcium acetate                   | 3 x 950 mg   | Chronic kidney disease (phosphate binder) |
| Enoxaparin                        | 1 x 20 mg*   | Thromboembolism prophylaxis               |
| Heparine<br>(during hemodialysis) | varying      | Hemodialysis                              |

\*Dose adjusted to GFR; NSTEMI, non-ST-elevation myocardial infarction

### Supplementary table 3

Parameters of remdesivir (200 mg single dose) and its metabolites

|                                                                                                                                                                                                                                                                                                                                                                                                                                                                                                                                                                         | Parameter                                              | Index patient<br>(no renal function) | Humeniuk et al. 2020 <sup>a</sup><br>(healthy volunteers) |
|-------------------------------------------------------------------------------------------------------------------------------------------------------------------------------------------------------------------------------------------------------------------------------------------------------------------------------------------------------------------------------------------------------------------------------------------------------------------------------------------------------------------------------------------------------------------------|--------------------------------------------------------|--------------------------------------|-----------------------------------------------------------|
| <b>Remdesivir<br/>(GS-5734)</b>                                                                                                                                                                                                                                                                                                                                                                                                                                                                                                                                         | AUC <sub>0-∞</sub> * <sup>a</sup>                      | 13.0 µg/mL*h                         | 3.3 µg/mL*h                                               |
|                                                                                                                                                                                                                                                                                                                                                                                                                                                                                                                                                                         | C <sub>max</sub>                                       | 19.8 µg/mL                           | 7.8 µg/mL                                                 |
|                                                                                                                                                                                                                                                                                                                                                                                                                                                                                                                                                                         | Clearance                                              | 257 mL/min                           | 1000 mL/min                                               |
|                                                                                                                                                                                                                                                                                                                                                                                                                                                                                                                                                                         | Volume of distribution (V <sub>z</sub> )* <sup>a</sup> | 24.5 L                               | 87 L                                                      |
|                                                                                                                                                                                                                                                                                                                                                                                                                                                                                                                                                                         | Apparent elimination half-life* <sup>a</sup>           | 1.10 h                               | 1 h                                                       |
| <b>GS-441524</b>                                                                                                                                                                                                                                                                                                                                                                                                                                                                                                                                                        | AUC <sub>0-20.1 h</sub>                                | 18.4 µg/mL*h                         | n.a.                                                      |
|                                                                                                                                                                                                                                                                                                                                                                                                                                                                                                                                                                         | C <sub>max</sub>                                       | 1.15 µg/mL*h                         | 0.2 ng/mL                                                 |
|                                                                                                                                                                                                                                                                                                                                                                                                                                                                                                                                                                         | Apparent elimination half-life                         | not estimable (∞)                    | 27 h                                                      |
| <b>GS-704277</b>                                                                                                                                                                                                                                                                                                                                                                                                                                                                                                                                                        | Apparent elimination half-life* <sup>a</sup>           | 2.98 h                               | 1.3 h                                                     |
| <sup>a</sup> values reported for the 30 min infusion of 75 mg extrapolated to a 200 mg dose assuming dose linearity <sup>1</sup> ; clearance was calculated from reported parameters as dose/AUC and volume of distribution as half-life * clearance /ln(2); * estimated using the last 3 time points with quantifiable remdesivir concentrations; AUC <sub>0-∞</sub> , area under the concentration vs. time profile extrapolated to infinity; C <sub>max</sub> , maximal observed plasma concentration; V <sub>z</sub> , volume of distribution at pseudo-equilibrium |                                                        |                                      |                                                           |

### Supplementary table 4

Quantification of systemic remdesivir prodrug (GS-5734) and GS-441524 metabolite, relative quantification of remdesivir intermediate metabolite (GS-704277)

| Sample ID | Sampling time      | Time after start infusion (h) | Remdesivir (ng/mL) | GS-441524 (ng/mL) | Ratio GS-704277/IS |
|-----------|--------------------|-------------------------------|--------------------|-------------------|--------------------|
| DH-1      | 24.09.2020 - 13:02 | 0                             | BQL                | BQL               | -                  |
| DH-2      | 24.09.2020 - 13:22 | 0.25                          | 19845.3            | 46.208            | 0.955              |
| DH-3      | 24.09.2020 - 13:36 | 0.48                          | 15513.7            | 145.65            | 3.028              |
| DH-4      | 24.09.2020 - 13:50 | 0.72                          | 8525.0             | 264.93            | 4.392              |
| DH-5      | 24.09.2020 - 14:05 | 0.97                          | 2918.6             | 375.16            | 4.234              |
| DH-6      | 24.09.2020 - 14:35 | 1.47                          | 1484.9             | 460.43            | 3.227              |
| DH-7      | 24.09.2020 - 15:32 | 2.42                          | 439.80             | 883.10            | 1.989              |
| DH-8      | 24.09.2020 - 17:32 | 4.42                          | 127.69             | 958.27            | 1.613              |
| DH-9      | 24.09.2020 - 19:43 | 6.60                          | 31.729             | 859.15            | 0.756              |
| DH-1      | 25.09.2020 - 07:06 | 17.98                         | BQL                | 1152.7            | 0.229              |
| DH-11     | 25.09.2020 - 09:14 | 20.12                         | BQL                | 876.44            | 0.148              |
| DH-12     | 25.09.2020 - 10:59 | 21.87                         | BQL                | 856.22            | -                  |
| DH-15     | 25.09.2020 - 13:55 | 24.80                         | BQL                | 589.44            | -                  |
| DH-18     | 25.09.2020 - 16:45 | 27.63                         | BQL                | 442.62            | -                  |
| DH-19     | 25.09.2020 - 17:03 | 27.93                         | 8327.6             | 430.08            | 0.358              |
| DH-20     | 25.09.2020 - 17:15 | 28.13                         | 6548.0             | 404.21            | 2.272              |
| DH-21     | 25.09.2020 - 17:29 | 28.37                         | 3225.5             | 611.62            | 2.953              |
| DH-22     | 26.09.2020 - 16:00 | 50.88                         | BQL                | 1659.5            | -                  |
| DH-24     | 27.09.2020 - 16:30 | 75.38                         | BQL                | 1613.5            | -                  |
| DH-26     | 28.09.2020 - 09:55 | 91.80                         | BQL                | 1787.0            | -                  |
| DH-27     | 28.09.2020 - 11:34 | 93.45                         | BQL                | 1118.1            | -                  |
| DH-30     | 28.09.2020 - 13:40 | 95.55                         | BQL                | 835.26            | -                  |
| DH-33     | 28.09.2020 - 14:45 | 96.63                         | BQL                | 810.75            | -                  |
| DH-36     | 28.09.2020 - 15:05 | 96.97                         | BQL                | 549.99            | -                  |
| Dialysate | 25.09.2020 - 17:25 | -                             | BQL                | 197..93           | -                  |

Abbreviations: BQL, Below Quantification Limit (remdesivir: 3.60 ng/mL, GS-441524: 10.8 ng/mL); IS, internal standard

### Supplementary table 5

Quantification of remdesivir prodrug (GS-5734) and GS-441524 metabolite in arterial (inlet) and venous (outlet) lines of the hemodialysis system

| Sample ID | Sampling time      | Time after start infusion (h) | Remdesivir (ng/mL) | GS-441524 (ng/mL) |
|-----------|--------------------|-------------------------------|--------------------|-------------------|
| DH-13 HDA | 25.09.2020 - 11:05 | 21.97                         | BQL                | 792.30            |
| DH-14 HDV | 25.09.2020 - 11:05 | 21.97                         | BQL                | 334.94            |
| DH-16 HDA | 25.09.2020 - 13:55 | 24.80                         | BQL                | 540.66            |
| DH-17 HDV | 25.09.2020 - 13:55 | 24.80                         | BQL                | 229.09            |
| DH-28 HDA | 28.09.2020 - 11:34 | 93.45                         | BQL                | 1217.3            |
| DH-29 HDV | 28.09.2020 - 11:34 | 93.45                         | BQL                | 395.95            |
| DH-31 HDA | 28.09.2020 - 13:40 | 95.55                         | BQL                | 862.97            |
| DH-32 HDV | 28.09.2020 - 13:40 | 95.55                         | BQL                | 459.22            |
| DH-34 HDA | 28.09.2020 - 14:45 | 96.63                         | BQL                | 920.17            |
| DH-35 HDV | 28.09.2020 - 14:45 | 96.63                         | BQL                | 549.99            |

Abbreviations: HDA, hemodialysis arterial line (inlet); HDV, hemodialysis venous line (outlet); BQL, Below Quantification Limit (remdesivir: 3.60 ng/mL, GS-441524: 10.8 ng/mL)

## Supplementary figure 1

Chest computed tomography (CT) performed eight days after diagnosis

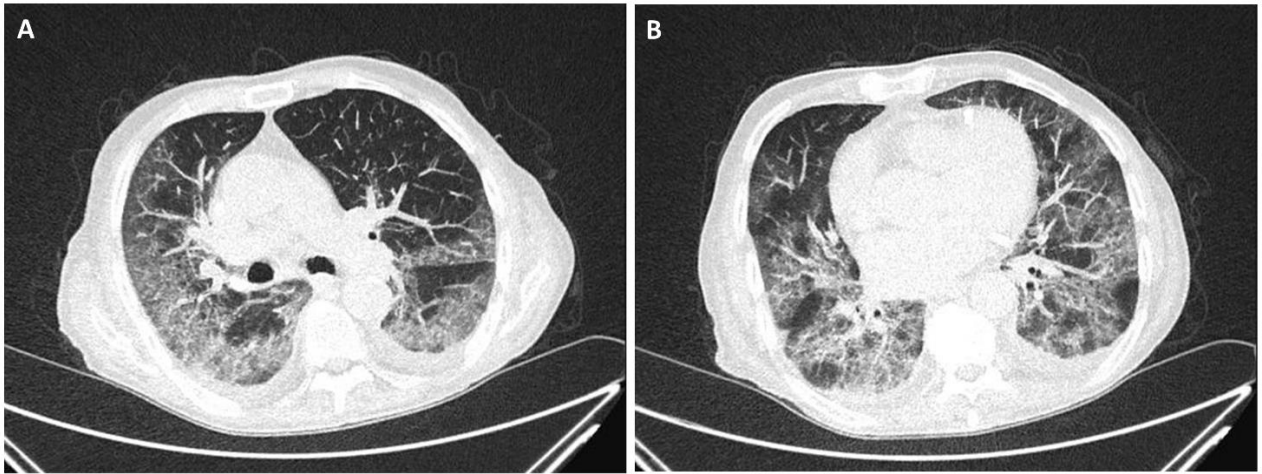

A (cranial) and B (caudal) pictures from low-dose plain CT scan performed 22.09.2020 showing progressive bipulmonary ground glass opacities and consolidations with a predominantly peripheral distribution pattern. In addition, linear intralobular septal thickening (crazy paving) and small pleural effusions.

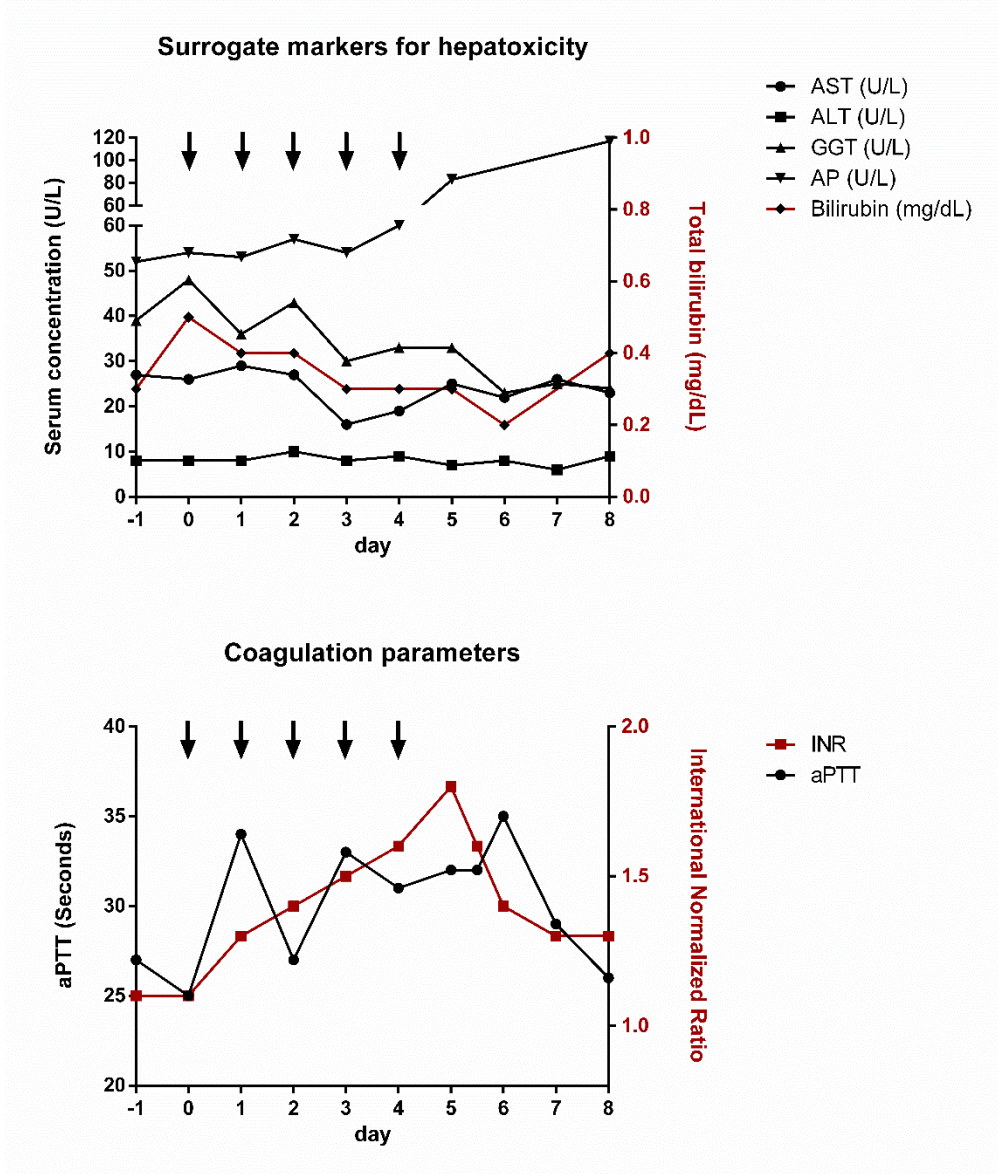

**Supplementary figure 2.** Daily monitoring of toxicity markers during antiviral treatment (day 0-4, ↓) of a patient with end-stage renal disease with the standard regimen of remdesivir (200 mg d0, 100 mg d1-4 IV) and follow up (day 5-8). Hemodialysis was performed on days 1 and 4. Laboratory reference ranges are not shown here but were only exceeded in case of INR which nearly normalized under vitamin K supplementation. Abbreviations: AST, aspartate transaminase; ALT, alanine aminotransaminase; GGT, gamma-glutamyltransferase; AP, alkaline phosphatase; Bilirubin = total bilirubin; INR, International Normalized Ratio, aPTT, activated partial thromboplastin time.

## Methods

### Administration of remdesivir

Remdesivir was administered as controlled intravenous infusion (500 mL/h) over 30 minutes via femoral vein catheter without any parallel infusions (for doses and timing see figure 1). Markers for hepatotoxicity were monitored at least daily during treatment with remdesivir and for subsequent days (supplementary figure 2).

### Pharmacokinetic sampling

Blood samples were drawn from the arterial line after discarding dead space volume. In addition, several blood samples were taken from the inlet and the outlet of the dialysis device to analyze drug elimination during hemodialysis. Polypropylene tubes containing 1.2 mg/mL ethylenediaminetetraacetic acid (EDTA) to prevent clotting and 1 mg/mL of sodium fluoride (Sarstedt, Nümbrecht, Germany) were used and directly placed on ice to prevent *in vitro* hydrolysis of remdesivir<sup>2</sup> and its metabolites before further processing within a maximum of one hour. Plasma was separated by centrifugation at 4°C and subsequently stored at -80°C prior to pharmacokinetic analyses.

### Hemodialysis

Hemodialysis was performed using the Fresenius GENIUS® device, a single pass close tank hemodialysis system, containing 90 liters of dialysis fluid. The system was equipped with an FX600 CorDiax® hemodialysis filter (Fresenius) and standard blood lines and tubing. The extracorporeal circuit was established via central venous catheter. Blood flow ranged between 150 and 280 mL/min. According to technical design, dialysate flow equaled blood flow. Ultrafiltration settings ranged between 100 and 200 ml/h. Hemodialysis was performed prior to administration of the daily remdesivir dose on days 2 and 5 of treatment. In the two dialysis sessions a blood volume of 88 and 90 liters was processed. Duration of treatment was 425 minutes and 315 minutes. Ultrafiltration volume was 990 ml and 1037 ml, respectively. For anticoagulation unfractionated heparin was administered as intravenous bolus of 2000 IE at the beginning of hemodialysis and a rate of 1000 IE/h during treatment.



## Determination of remdesivir and metabolites

Measurements of drug concentrations were performed at the Institute for Biomedical and Pharmaceutical Research, Nürnberg-Heroldsberg, Germany. Remdesivir and its metabolite GS-441524 were purchased from BIOSYNTH® Carbosynth (Berkshire, UK). Calibration standards and spiked quality control samples were prepared in drug-free human EDTA plasma. Liquid chromatography/mass spectrometry to detect the compounds used transitions REM 603.3→402.0 and 292.2→163.1 (GS-441524) on a SCIEX API 6500TM triple quadrupole mass spectrometer equipped with turbo ion spray interface (SCIEX, Concord, Ontario, Canada). Calibration for both compounds was performed by weighted ( $1/\text{concentration}^2$ ) linear regression. Linearity for remdesivir and GS-441524 in human plasma could be demonstrated over a calibration range from 3.600 to 787.4 ng/mL for remdesivir and from 10.84 to 474.5 ng/mL for GS-441524. Quantification of remdesivir and GS-441524 was performed by peak area ratio of analyte to internal standard (remdesivir: piperacillin-d5, GS-441524 amoxicillin-d4). When samples were outside that range a dilution by drug free human plasma was used. No interferences were observed for remdesivir and GS-441524 and the internal standards in human plasma. Since there was no reference standard available for the intermediate metabolite GS-704277, only the time course of plasma concentrations could be described which were obtained from peak heights relative to an internal standard (transition 443.1→202.1).

## Pharmacokinetic assessment

Pharmacokinetic parameters following the first dose for remdesivir and its metabolites were calculated by standard non-compartmental methods. Extraction of GS-441524 by dialysis was calculated as  $(1\text{-outlet concentration [corrected for volume loss]} / \text{inlet concentration})$ . The observed decrease of GS-441524 extraction during dialysis was described by linear regression with cumulative blood flow.

## References

1. Humeniuk R, Mathias A, Cao H et al. Safety, Tolerability, and Pharmacokinetics of Remdesivir, An Antiviral for Treatment of COVID-19, in Healthy Subjects. *Clin Transl Sci* 2020; **13**: 896-906.

2. Scherf-Clavel O, Kaczmarek E, Kinzig M et al. Tissue level profile of SARS-CoV-2 antivirals in mice to predict their effects in COVID-19 multiorgan failure. *bioRxiv* 2020: 2020.09.16.299537.
